# Supplementary material
Source: PubMed Central journal article supplement (PMC7772941)
Supplement: NIHMS1653457-supplement-SM.pdf [file NIHMS1653457-supplement-SM.pdf]

## **Supplemental Methods S1. Systematic review of literature.**

We performed a systematic review and meta-analysis to determine the impact of malignant peritoneal cytology on prognosis in patients with early endometrial cancer. The meta-analysis aimed to investigate survival outcome (OS), cause-specific survival (CSS), and disease-free survival (DFS), with comparison of malignant and negative peritoneal cytology results.

### **1. Article retrieval**

We conducted a systematic search of articles published through September 30, 2019, using PubMed, Scopus, and Cochrane Central Register of Controlled Trials (CENTRAL), as performed in our previous study (1, 2). We reviewed articles according to the Preferred Reporting Items for Systematic Reviews and Meta-Analyses guidelines (3). Studies were identified by screening the titles, abstracts, and full texts of relevant articles, as previously described. All abstracts were screened by two authors (SM and YN).

Initially, various patterns of keywords listed below were used to identify studies on endometrial cancer. We used the International Federation of Obstetrics and Gynecology (FIGO) 1988 or 2009 system to identify FIGO stage I and II endometrial cancer. The keywords were as follows: "corpus neoplasm" OR "corpus cancer" OR "corpus carcinoma" OR "corpus malignancy", "endometrial neoplasm" OR "endometrial cancer" OR "endometrial carcinoma" OR "endometrial malignancy", "carcinoma of the corpus" OR "carcinoma of the uterine corpus", "carcinoma of the endometrium" OR "carcinoma of the endometrium", "invasive carcinoma of the corpus" OR "invasive carcinoma of the uterine corpus", "invasive carcinoma of the endometrium" OR "invasive carcinoma of the uterine endometrium", and "endometrial adenocarcinoma" OR "endometrioid adenocarcinoma", and "adenocarcinoma of the endometrium" OR "adenocarcinoma of the endometrium"

Thereafter, the selected studies were screened to identify studies that investigated the impact of malignant peritoneal cytology on endometrial cancer, using the following keywords: "peritoneal cytology or peritoneal washing cytology or pelvic cytology or abnormal cytology or malignant cytology" and "stage IIIA". The references of the identified articles were also reviewed, and articles that met the inclusion criteria were included (Figure S3).

### **2. Inclusion criteria**

Studies were included if they met the following inclusion criteria: (i) patients with early endometrial cancer (tumour confined to the uterus); (ii) intraoperative peritoneal cytology at laparotomy; (iii) sufficient information to investigate relevant outcomes; (iv) effect sizes for outcomes with hazard ratio; and (v) original articles involving studies, such as retrospective or prospective cohort studies, population-based case-control studies, and randomised controlled trials.

The exclusion criteria were as follows: (i) insufficient information to clearly identify malignant peritoneal cytology cases; (ii) insufficient survival or recurrence information; (iii) not in the field of interest; (iv) inclusion of advanced stage or recurrent cases; (v) lack of a negative peritoneal cytology group; (vi) articles involving case reports, case series, and systematic reviews; (vii) articles not in English; and (viii) conference abstracts.

### **3. Data extraction**

Data were extracted by two authors (S.M. and Y.N.), and the following variables were recorded: histology type, year of study, first author's name, number of included cases, rate of malignant peritoneal cytology cases, and outcomes of interest (OS, CSS, and DFS).

#### 4. Meta-analysis plan

From the eligible study data (4-17), survival outcome estimates for malignant versus negative peritoneal cytology were computed by using the 95% confidence intervals of the reported values to estimate the hazard ratios for OS and DFS. If the comparison of outcome between malignant peritoneal cytology group and negative peritoneal cytology group was not investigated under the same stage of endometrial cancer, we excluded the studies from meta-analysis. Heterogeneity across studies was examined using  $I^2$ , which measures the percentage of total variation across studies. The meta-analysis and the production of all graphics were performed using RevMan 5.3 software (Cochrane Collaboration, Copenhagen, Denmark). For consistency, data from all outcomes (continuous and bivariate) were entered into RevMan 5.3 in such a way that negative effect sizes or relative risks less than one favored active intervention.

#### 5. References

1. Matsuo K, Shimada M, Matsuzaki S, Machida H, Nagase Y, Saito T, et al. Significance of Malignant Peritoneal Cytology on the Survival of Women with Early-Stage Cervical Cancer: A Japanese Gynecologic Oncology Group Study. *J Clin Med*. 2019;8(11).
2. Matsuzaki S, Yoshino K, Endo M, Kakigano A, Takiuchi T, Kimura T. Conservative management of placenta percreta. *Int J Gynaecol Obstet*. 2018;140(3):299-306.
3. Moher D, Liberati A, Tetzlaff J, Altman DG, Group P. Preferred reporting items for systematic reviews and meta-analyses: the PRISMA statement. *BMJ*. 2009;339:b2535.
4. Takahashi K, Yunokawa M, Sasada S, Takehara Y, Miyasaka N, Kato T, et al. A novel prediction score for predicting the baseline risk of recurrence of stage I-II endometrial carcinoma. *Journal of gynecologic oncology*. 2019;30(1):e8.
5. Matsuo K, Yabuno A, Hom MS, Shida M, Kakuda M, Adachi S, et al. Significance of abnormal peritoneal cytology on survival of women with stage I-II endometrioid endometrial cancer. *Gynecologic oncology*. 2018;149(2):301-9.
6. Tate K, Yoshida H, Ishikawa M, Uehara T, Ikeda SI, Hiraoka N, et al. Prognostic factors for patients with early-stage uterine serous carcinoma without adjuvant therapy. *Journal of gynecologic oncology*. 2018;29(3):e34.
7. Seagle BL, Alexander AL, Lantsman T, Shahabi S. Prognosis and treatment of positive peritoneal cytology in early endometrial cancer: matched cohort analyses from the National Cancer Database. *American journal of obstetrics and gynecology*. 2018;218(3):329.e1-.e15.
8. Scott SA, van der Zanden C, Cai E, McGahan CE, Kwon JS. Prognostic significance of peritoneal cytology in low-intermediate risk endometrial cancer. *Gynecologic oncology*. 2017;145(2):262-8.
9. Shiozaki T, Tabata T, Yamada T, Yamamoto Y, Yamawaki T, Ikeda T. Does positive peritoneal cytology not affect the prognosis for stage I uterine endometrial cancer?: the remaining controversy and review of the literature. *International journal of gynecological cancer : official journal of the International Gynecological Cancer Society*. 2014;24(3):549-55.
10. Haltia UM, Butzow R, Leminen A, Loukovaara M. FIGO 1988 versus 2009 staging for endometrial carcinoma: a comparative study on prediction of survival and stage distribution according to histologic subtype. *Journal of gynecologic oncology*. 2014;25(1):30-5.

11. Garg G, Gao F, Wright JD, Hagemann AR, Mutch DG, Powell MA. Positive peritoneal cytology is an independent risk-factor in early stage endometrial cancer. *Gynecologic oncology*. 2013;128(1):77-82.
12. Bansal S, Buck AM, Herzog TJ, Deutsch I, Burke WM, Wright JD. Stage IIIA endometrial carcinoma: outcome and predictors of survival. *Obstet Gynecol*. 2009;114(1):100-5.
13. Metindir J, Bilir Dilek G. Positive peritoneal cytology and its prognostic value in endometrioid adenocancer confined to the uterus. *Oncologie*. 2008;10(5):348-51.
14. Havrilesky LJ, Cragun JM, Calingaert B, Alvarez Secord A, Valea FA, Clarke-Pearson DL, et al. The prognostic significance of positive peritoneal cytology and adnexal/serosal metastasis in stage IIIA endometrial cancer. *Gynecologic oncology*. 2007;104(2):401-5.
15. Saga Y, Imai M, Jobo T, Kuramoto H, Takahashi K, Konno R, et al. Is peritoneal cytology a prognostic factor of endometrial cancer confined to the uterus? *Gynecologic oncology*. 2006;103(1):277-80.
16. Tebeu PM, Popowski Y, Verkooijen HM, Bouchardy C, Ludicke F, Usel M, et al. Positive peritoneal cytology in early-stage endometrial cancer does not influence prognosis. *British journal of cancer*. 2004;91(4):720-4.
17. Kasamatsu T, Onda T, Katsumata N, Sawada M, Yamada T, Tsunematsu R, et al. Prognostic significance of positive peritoneal cytology in endometrial carcinoma confined to the uterus. *British journal of cancer*. 2003;88(2):245-50

**Supplemental Table S1. Patient demographics per peritoneal cytology status (N=24800).**

| Characteristics                    | Negative      | Malignant     |
|------------------------------------|---------------|---------------|
| No.                                | n=23719       | n=1081        |
| <b>Age (yr)</b>                    |               |               |
| <40                                | 800 (96.5%)   | 29 (3.5%)     |
| 40-49                              | 2176 (96.1%)  | 88 (3.9%)     |
| 50-59                              | 7570 (95.2%)  | 382 (4.8%)    |
| 60-69                              | 8512 (95.6%)  | 388 (4.4%)    |
| 70-79                              | 3584 (96.4%)  | 135 (3.6%)    |
| ≥80                                | 1077 (94.8%)  | 59 (5.2%)     |
| <b>Year</b>                        |               |               |
| 2010                               | 3265 (96.2%)  | 130 (3.8%)    |
| 2011                               | 3231 (95.9%)  | 137 (4.1%)    |
| 2012                               | 3346 (95.9%)  | 144 (4.1%)    |
| 2013                               | 3248 (95.4%)  | 158 (4.6%)    |
| 2014                               | 3525 (95.3%)  | 175 (4.7%)    |
| 2015                               | 3631 (95.5%)  | 173 (4.5%)    |
| 2016                               | 3473 (95.5%)  | 164 (4.5%)    |
| <b>Race/ethnicity</b>              |               |               |
| White                              | 16846 (95.5%) | 801 (4.5%)    |
| Black                              | 1529 (97.5%)  | 35 (2.5%)     |
| Hispanic                           | 2674 (96.0%)  | 111 (4.0%)    |
| Asian                              | 2250 (95.0%)  | 119 (5.0%)    |
| Others                             | 203 (99.0%)   | 2 (1.0%)      |
| Unknown                            | 217 (94.3%)   | 13 (5.7%)     |
| <b>Marital status</b>              |               |               |
| Single                             | 4486 (95.0%)  | 234 (5.0%)    |
| Married                            | 12847 (95.8%) | 561 (95.8%)   |
| Divorced                           | 2453 (95.9%)  | 105 (95.9%)   |
| Separated                          | 209 (96.8%)   | 7 (96.8%)     |
| Widowed                            | 2504 (95.7%)  | 112 (95.7%)   |
| Unmarried/domestic                 | 79 (94.0%)    | 5 (94.0%)     |
| Unknown                            | 1141 (95.2%)  | 57 (95.2%)    |
| <b>Insurance</b>                   |               |               |
| Yes                                | 22883 (95.6%) | 1047 (4.4%)   |
| No                                 | 553 (96.2%)   | 22 (3.8%)     |
| Unknown                            | 283 (95.9%)   | 12 (4.1%)     |
| <b>Registry area</b>               |               |               |
| West                               | 12681 (53.5%) | 617 (57.1%)   |
| Central                            | 4521 (19.1%)  | 125 (11.6%)   |
| East                               | 6517 (27.5%)  | 339 (31.4%)   |
| <b>Tumour differentiation</b>      |               |               |
| Well                               | 10488 (96.4%) | 394 (3.6%)    |
| Moderate                           | 5280 (95.0%)  | 275 (5.0%)    |
| Poor                               | 1826 (93.2%)  | 133 (6.8%)    |
| Unknown                            | 6125 (95.6%)  | 279 (4.4%)    |
| <b>T stage</b>                     |               |               |
| IA                                 | 18870 (96.2%) | 738 (3.8%)    |
| IB                                 | 4246 (93.0%)  | 320 (7.0%)    |
| I NOS                              | 603 (96.3%)   | 23 (3.7%)     |
| <b>Pelvic lymphadenectomy</b>      |               |               |
| No                                 | 14 (IQR 9-20) | 14 (IQR 9-20) |
| No                                 | 8405 (35.4%)  | 264 (24.4%)   |
| Yes                                | 15218 (64.2%) | 814 (75.3%)   |
| Unknown                            | 96 (0.4%)     | 3 (0.3%)      |
| <b>Para-aortic lymphadenectomy</b> |               |               |
| No                                 | 5 (IQR 3-9)   | 5 (IQR 9-20)  |
| No                                 | 16755 (70.6%) | 659 (61.0%)   |
| Yes                                | 6819 (28.7%)  | 416 (38.5%)   |

|                    |               |             |
|--------------------|---------------|-------------|
| Unknown            | 145 (0.6%)    | 6 (0.6%)    |
| <hr/>              |               |             |
| Tumour size (cm)   |               |             |
| ≤2.0               | 5662 (96.6%)  | 201 (3.4%)  |
| 2.1-4.0            | 7528 (95.0%)  | 398 (5.0%)  |
| 4.1-6.0            | 3825 (94.9%)  | 207 (5.1%)  |
| 6.1-8.0            | 1179 (95.9%)  | 51 (4.1%)   |
| >8.0               | 540 (94.2%)   | 33 (5.8%)   |
| Unknown            | 4985 (96.3%)  | 191 (3.7%)  |
| <hr/>              |               |             |
| Hysterectomy type  |               |             |
| Simple             | 22114 (95.7%) | 1004 (4.3%) |
| Modified / radical | 755 (95.6%)   | 35 (4.4%)   |
| Supracervical      | 213 (97.3%)   | 6 (2.7%)    |
| NOS                | 637 (94.7%)   | 36 (5.3%)   |
| <hr/>              |               |             |
| Postop therapy     |               |             |
| None               | 19263 (96.6%) | 668 (3.4%)  |
| VBT                | 2887 (94.3%)  | 173 (5.7%)  |
| WPRT               | 949 (92.3%)   | 79 (7.7%)   |
| VBT / chemo        | 239 (78.9%)   | 64 (21.1%)  |
| Chemo              | 205 (76.2%)   | 64 (23.8%)  |
| WPRT / chemo       | 140 (81.9%)   | 31 (18.1%)  |
| RT NOS             | 31 (96.9%)    | 1 (3.1%)    |
| RT NOS / chemo     | 5 (83.3%)     | 1 (16.7%)   |

Number (% per row) or median (IQR) is shown. Abbreviations: NOS, not otherwise significant; VBT, vaginal brachytherapy; WPRT, whole pelvic radiotherapy; RT, radiotherapy; and chemo, chemotherapy.

**Supplemental Table S2. Metadata for the results of systematic review.**

| Author                   | Year | No.   | Histology          | Stage                          | The rate of MPC | Survival           | Recurrence     | Adjuvant chemo |
|--------------------------|------|-------|--------------------|--------------------------------|-----------------|--------------------|----------------|----------------|
| Matsuo current           | 2020 | 24800 | EM                 | Stage I                        | 1081 (4.4%)     | ↓ OS, CSS          | NA             | NA             |
|                          |      | 4346  |                    | Stage I, HIR                   | 277 (6.4%)      | ↓ OS, CSS          | NA             | ↓ death        |
|                          |      | 12761 |                    | Stage I, low risk              | 459 (3.5%)      | ↓ CSS              | NA             |                |
| Takahashi <sup>4</sup>   | 2019 | 251   | EM, non-EM         | Stage I, II                    | 30 (12.0%)      | NA                 | ↓ DFS          | NA             |
| Matsuo <sup>5</sup>      | 2018 | 1668  | EM                 | Stage I, II                    | 125 (7.5%)      | ↓ CSS              | ↓ DFS          | ↓ recurrence   |
|                          |      |       |                    | Stage I Low risk <sup>*</sup>  | NA              | NA                 | ↓ DFS          | NA             |
|                          |      |       |                    | Stage I High risk <sup>#</sup> | NA              | NA                 | No association | NA             |
| Tate <sup>6</sup>        | 2018 | 68    | SC                 | Stage I, II                    | 14 (20.6%)      | ↓ OS               | ↓ DFS          | NA             |
| Seagle <sup>7</sup>      | 2018 | 16851 | EM, CS, CCC, other | Stage I, II                    | 953 (5.7%)      | ↓ OS               | NA             | ↓ death        |
|                          |      | 9550  | Low-grade EM       | Stage I, II                    | NA              | ↓ OS               | NA             | NA             |
| Scott <sup>8</sup>       | 2017 | 668   | EM                 | Stage I <sup>\$</sup>          | 15 (2.2%)       | No association     | ↓ DFS          | NA             |
| Shiozaki <sup>9</sup>    | 2014 | 265   | EM, CS, SC         | Stage I                        | 27 (10.2%)      | NA                 | ↓ DFS          | NA             |
| Haltia <sup>10</sup>     | 2014 | 685   | EM                 | Stage I, II                    | 11 (1.6%)       | ↓ CSS              |                | NA             |
| Garg <sup>11</sup>       | 2013 | 14704 | EM, Mu, CS, CCC    | Stage I, II                    | 485 (3.3%)      | ↓ CSS <sup>‡</sup> | NA             | NA             |
| Bansal <sup>12</sup>     | 2009 | 17945 | EM                 | Stage I <sup>**</sup>          | 485 (2.7%)      | ↓ OS <sup>‡‡</sup> | NA             | NA             |
| Metindir <sup>13</sup>   | 2008 | 46    | EM                 | Stage I, II                    | 4 (9.5%)        | NA                 | ↓ DFS          | NA             |
| Havrilesky <sup>14</sup> | 2007 | 524   | EM, Mu, SC, CCC    | Stage I, II                    | 37 (7.1%)       | ↓ OS               | NA             | NA             |
| Saga <sup>15</sup>       | 2006 | 307   | EM                 | Stage I, II                    | 32 (10.4%)      | ↓ CSS              | NA             | NA             |
| Tebeu <sup>16</sup>      | 2004 | 331   | NA                 | Stage I                        | 33 (10.0%)      | No association     | NA             | NA             |
| Kasamatsu <sup>17</sup>  | 2003 | 280   | EM                 | Stage I, II                    | 48 (17.1%)      | No association     | No association | NA             |

<sup>\*</sup>ESMO-ESGO-ESTRO criteria: low risk, stage IA grade 1–2 endometrioid tumours without LVSI

<sup>#</sup>Analyzed stage cases for GOG-099 high-intermediate risk group (modified)

<sup>\$</sup>Stage IA grade 1 to 3 tumours, and Stage IB grade 1 or 2 tumours.

<sup>‡</sup>Malignant peritoneal cytology (Stage I and II) and negative peritoneal cytology (stage IA) was compared

<sup>\*\*</sup> FIGO 1988 stage IB and IC

<sup>‡‡</sup> Positive peritoneal cytology and negative peritoneal cytology (FIGO 1988 stage IB and IC) was compared

Abbreviations: CCC, clear cell carcinoma, CS, carcinosarcoma; CSS, cause-specific survival; DFS, disease-free survival; EM, endometrioid adenocarcinoma; ESMO, European Society for Medical Oncology; ESGO, European Society of Gynaecological Oncology; ESTRO, European Society for Radiotherapy and Oncology; HIR, high-intermediate; GOG, Gynecologic Oncology Group; Mu, mucinous carcinoma; NA, not available; OS, overall survival; PPC, positive peritoneal cytology; SC, serous carcinoma.

**Supplemental Figure S1. Standardised differences before and after PS-IPTW (whole cohort).**

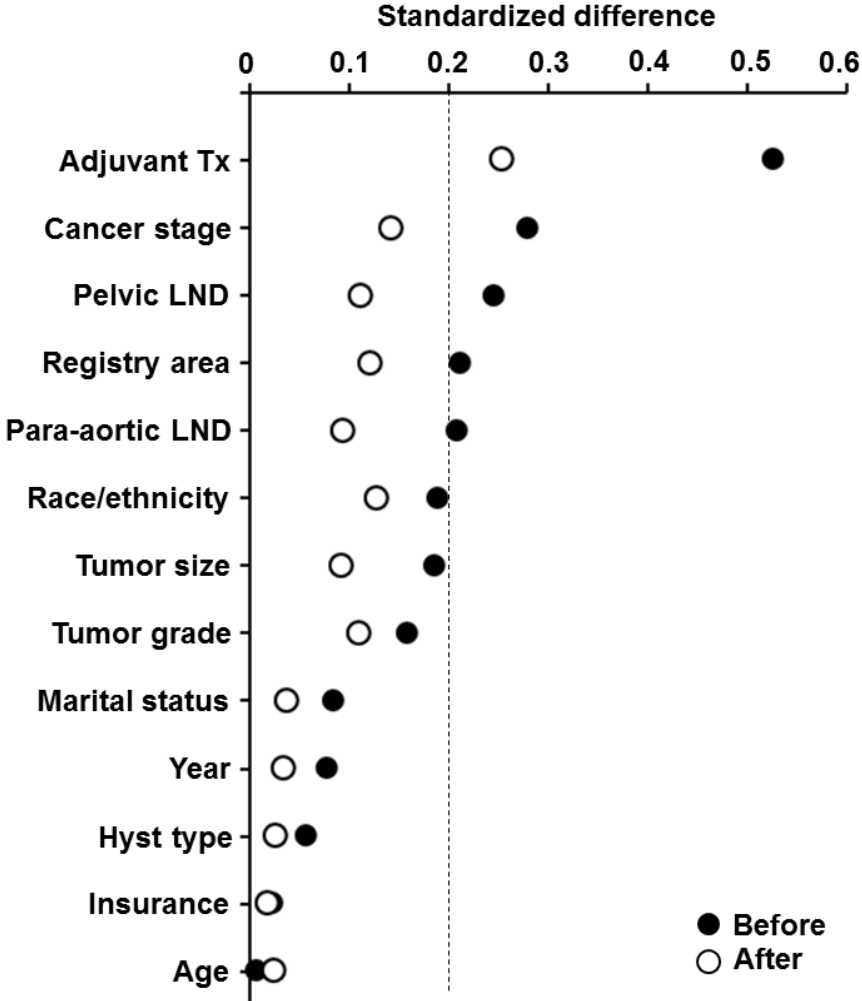

Standardised difference of 0.2, 0.5, and 0.8 were used for the cutoff of small, medium, and large effect size. Abbreviations: PS-IPTW, propensity score inverse probability of treatment weighting; hyst, hysterectomy; LND, lymphadenectomy; and Tx, therapy.

**Supplemental Figure S2. Standardised differences before and after PS-IPTW (high-intermediate risk group).**

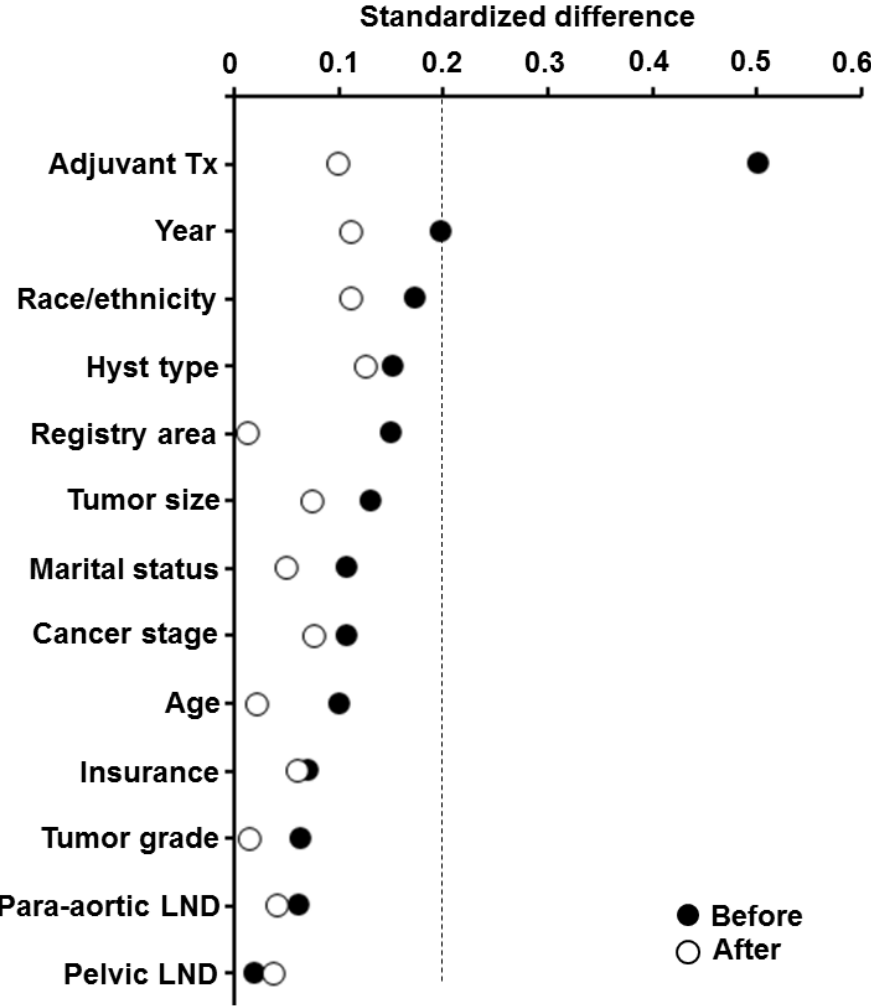

Standardised difference of 0.2, 0.5, and 0.8 were used for the cutoff of small, medium, and large effect size. Abbreviations: PS-IPTW, propensity score inverse probability of treatment weighting; hyst, hysterectomy; LND, lymphadenectomy; and Tx, therapy.



**Supplemental Figure S3. Standardised differences before and after PS-IPTW (low-risk group).**

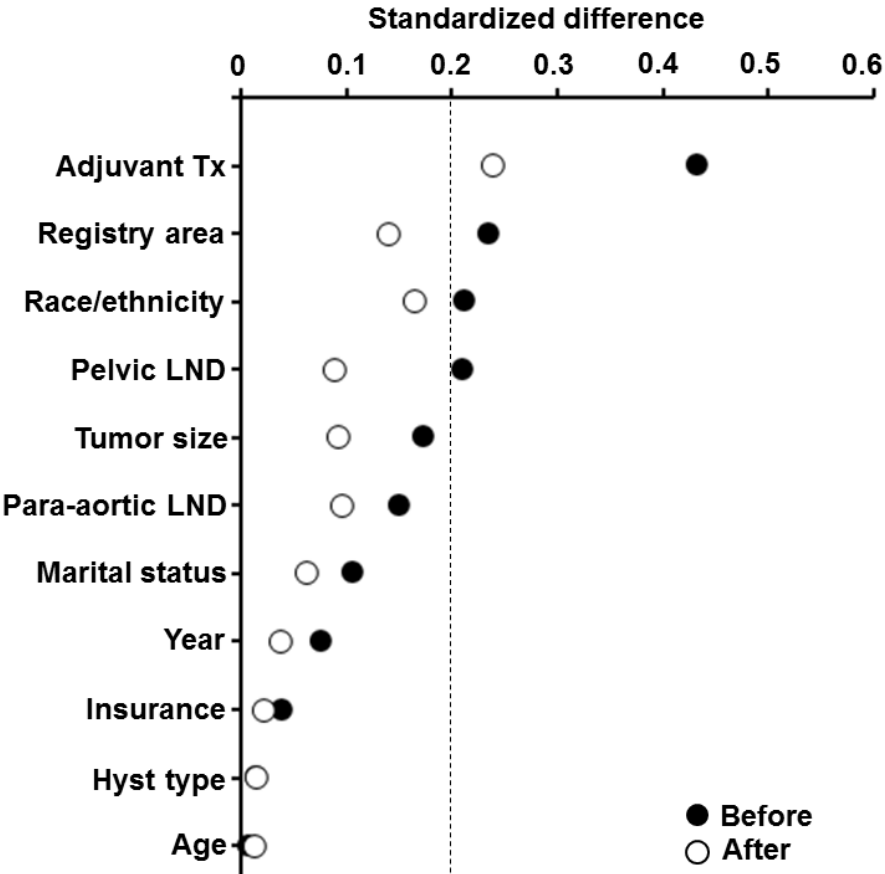

Standardised difference of 0.2, 0.5, and 0.8 were used for the cutoff of small, medium, and large effect size. Abbreviations: PS-IPTW, propensity score inverse probability of treatment weighting; hyst, hysterectomy; LND, lymphadenectomy; and Tx, therapy.

**Supplemental Figure S4. Standardised differences before and after generalized boost modeling (whole cohort).**

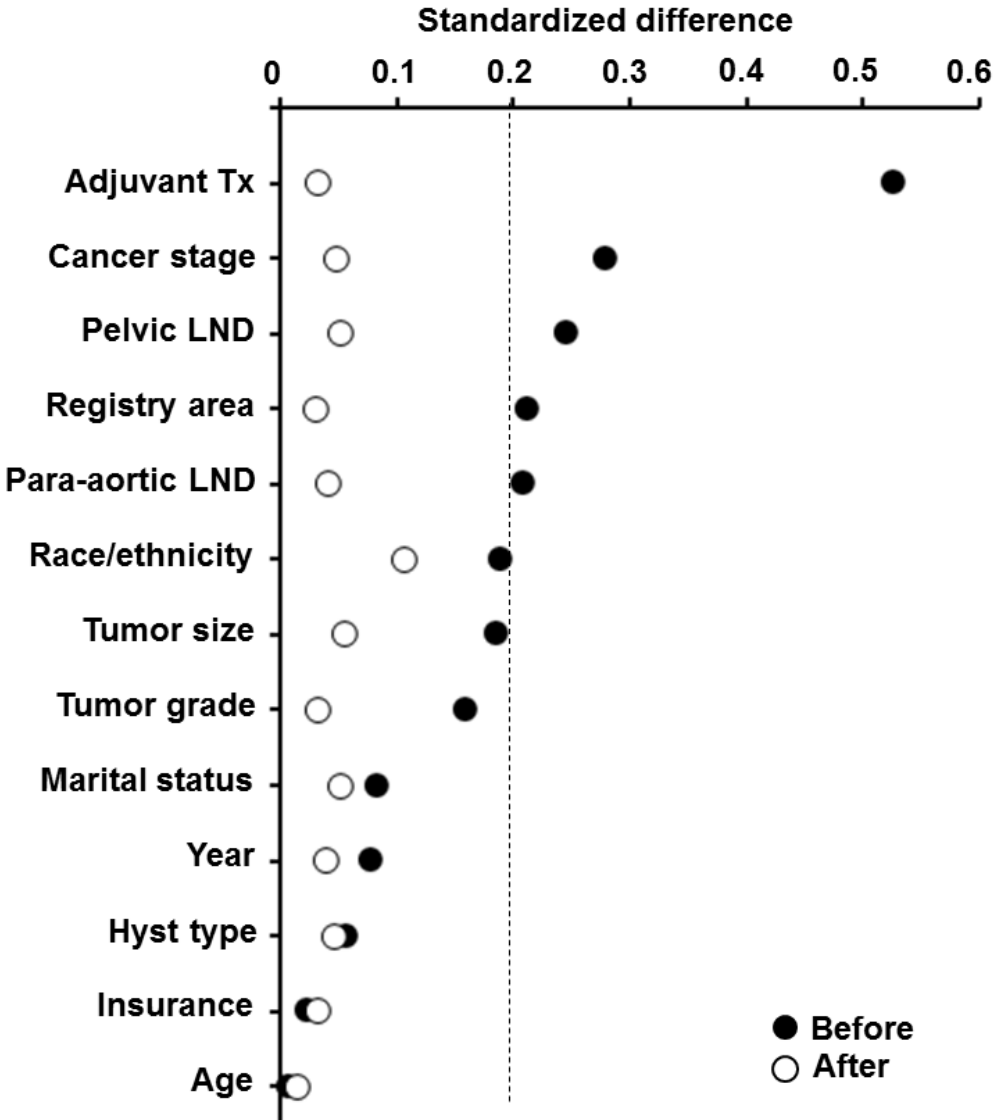

Standardised difference of 0.2, 0.5, and 0.8 were used for the cutoff of small, medium, and large effect size. Abbreviations: PS-IPTW, propensity score inverse probability of treatment weighting; hyst, hysterectomy; LND, lymphadenectomy; and Tx, therapy.

**Supplemental Figure S5. Study schema for systematic review of literature.**

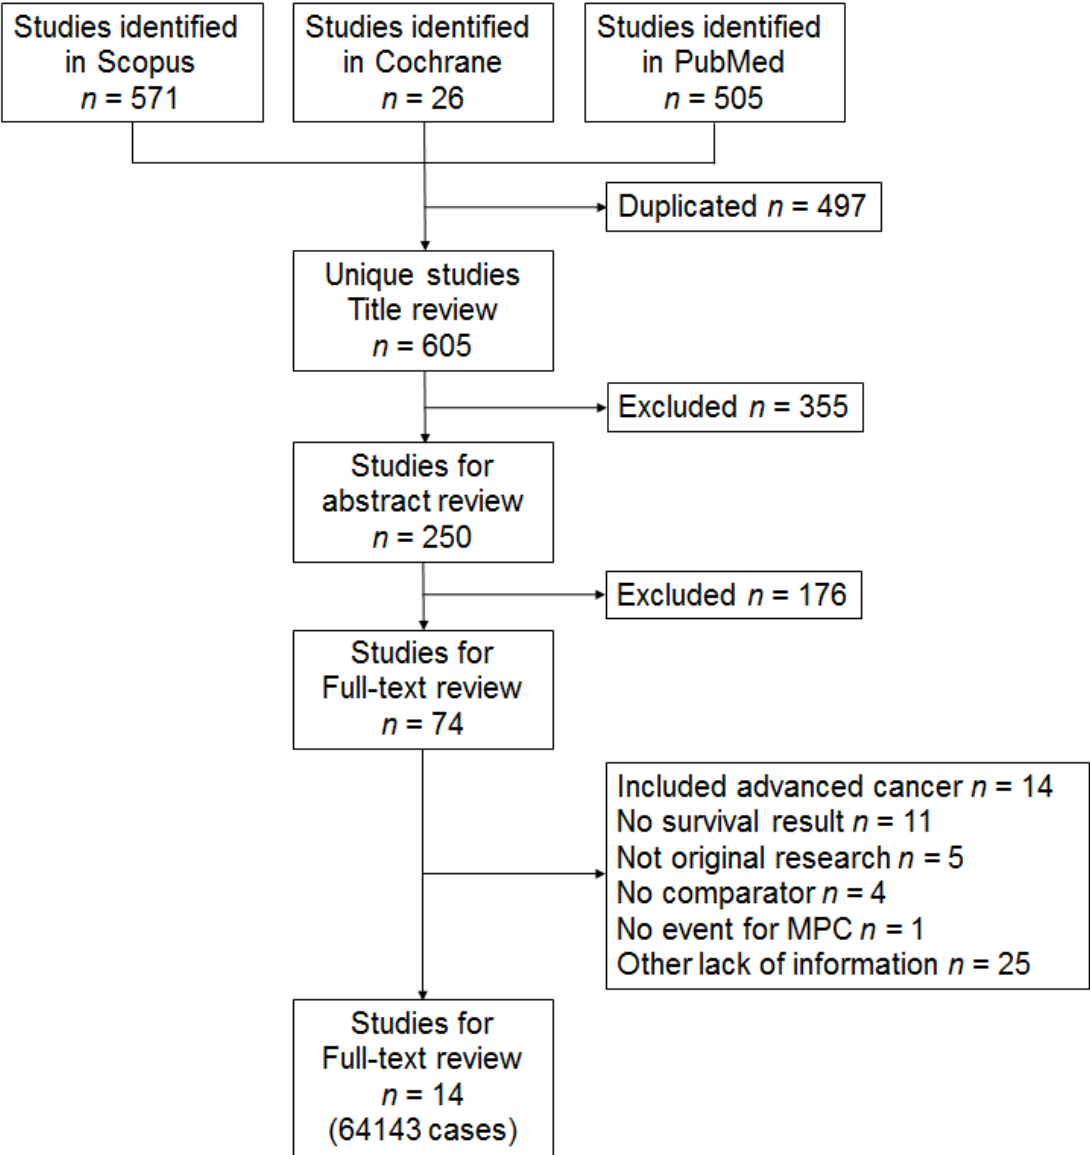

Abbreviation: MPC, malignant peritoneal cytology.

**Supplemental Figure S6. Funnel plots for meta-analysis.**

Disease-free survival

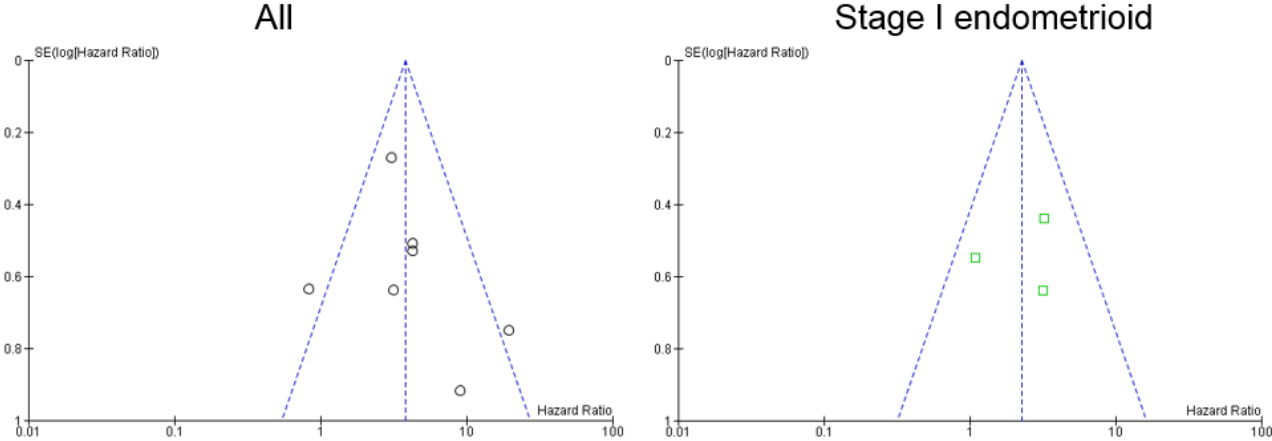

Overall survival

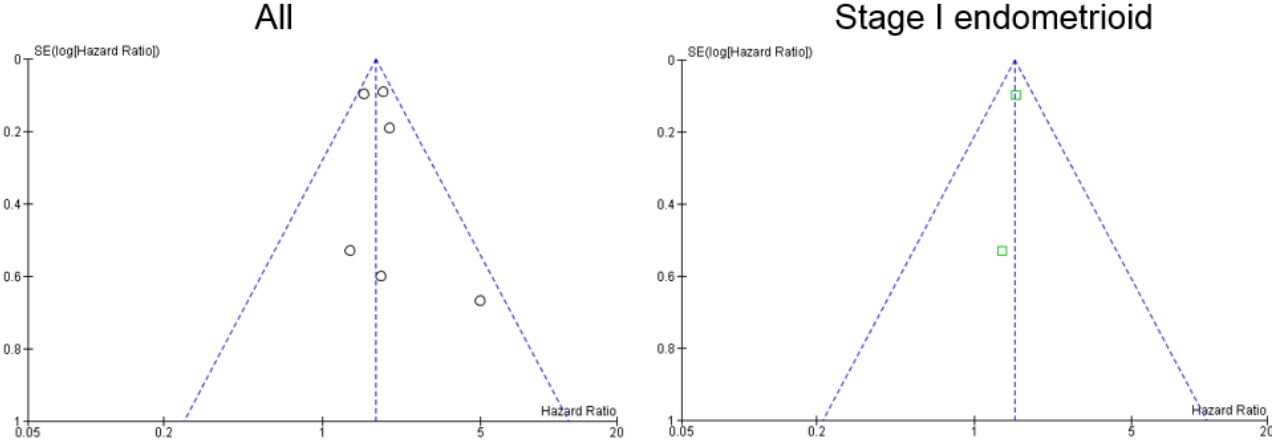

Funnel plot analysis of studies on disease-free survival and overall survival. The Funnel plots have an almost symmetrical distribution. Publication bias was not found in the meta-analysis.
